# Supplementary material for: Coconut Rhinoceros Beetle in Samoa: Review of a Century-Old Invasion and Prospects for Control in a Changing Future
Source: MDPI journal article supplement (doi:10.3390/insects13050487), 2022-05-23
Supplement: s1 [file s1]

# Screening of *Oryctes* Beetle gut samples from Samoa for the presence of *Oryctes* Virus

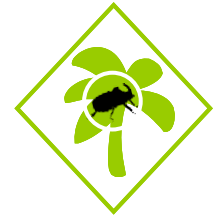

Jana Lottmann, AgResearch Lincoln

6 July 2007

*Oryctes* beetle gut samples (n = 250) were sent for screening for the *Oryctes* virus in February, March and June 2007.

## Method

For the gut samples stored in ethanol, approx. 3mm pieces were ground using a sterile micropestle in 180µl of ATL buffer (Qiagen DNeasy Tissue Kit, Biolab Scientific QIA69504). The method was continued as per the kit instructions. At the final step the sample was eluted in 100µl of the elution buffer and stored at 4°C or -20°C long term.

PCR was set up using two different primer pairs specific to the *Oryctes* virus (OrV3a / OrV15b, and OrV15a /OrV15b). Positive and negative controls were included in the PCR set-up to ensure confidence in the results. The presence of *Oryctes* DNA resulted in a 945 bp fragment. BSA was included in the PCR reaction mix to reduce the inhibitory affects caused by the presence of humic acids or other inhibitors.

## Results

In total, 54 gut samples were screened for the presence of *Oryctes* virus. According to the description of the samples (sex, and the condition of the insect and its gut), samples from all categories were screened for the presence of the virus. There was no sample sheet for the second lot (no. D1 to D50) but according to the appearance different samples have been analysed.

So far, only three samples (A6, E11, and E25) were negative in the PCR. Except for six samples (A19, A26, B14, C31, C44, and E44) which gave a weak PCR product, all other samples gave a strongly positive result in the PCR. In all cases the PCR negative control was negative.

The results showed that either primer pair could be used to detect OrV. There was no difference in the intensity of bands.

The PCR result are shown in the following tables:

| Insect | Site    | Trap | Collection | Sex | Dissection  | Insect and gut condition                                                               | PCR     |
|--------|---------|------|------------|-----|-------------|----------------------------------------------------------------------------------------|---------|
|        | No.     | No.  | Date       |     | Date        |                                                                                        | Results |
| A1     | Vaitele |      | 01-Nov-06  | F   | 02/Nov/2006 | Female, live. Gut thin and dark with attached fat                                      |         |
| A2     | Vaitele |      | 30-Oct-06  | F   | 02/Nov/2006 | Mature female dead with some tissue deterioration, eggs in oviduct. Gut dark and thin. |         |
| A3     | Vaitele |      | 30-Oct-06  | F   | 02/Nov/2006 | Female dead slightly swollen milky.                                                    |         |
| A4     | Vaitele |      | 03-Nov-06  | M   | 03/Nov/2006 | Live male, Gut milky at front & dark rear                                              |         |
| A5     | Vaitele |      | 03-Nov-06  | F   | 03/Nov/2006 | Female, live, gut dark, lots of eggs.                                                  |         |
| A6     | Vaitele |      | 06-11-06   | F   | 10/Nov/2006 | Milky gut, dead, egg laden                                                             | Ø       |
| A7     | Vaitele |      | 06-11-06   | F   | 10/Nov/2006 | Dead, slightly swollen, milky, lots of eggs.                                           |         |
| A8     | Vaitele |      | 06-11-06   | F   | 16/Nov/2006 | Young female, dead, gut dark thin with fat attached.                                   |         |
| A9     | Vaitele |      | 10-11-06   | F   | 16/Nov/2006 | Dead, gut dark thin full of organic matter.                                            |         |
| A10    | Vaitele |      | 06-11-06   | M   | 16/Nov/2006 | Dead, gut swollen, milky.                                                              |         |
| A11    | Vaitele |      | 10-11-06   | M   | 10/Nov/2006 | Mature beetle, dead, gut swollen and milky.                                            |         |
| A12    | Vaitele |      | 10-11-06   | F   | 16/Nov/2006 | Dead, gut slightly swollen, milky.                                                     |         |
| A13    | Vaitele |      | 10-11-06   | M   | 16/Nov/2006 | Mature, dead, gut swollen milky.                                                       |         |
| A14    | Vaitele |      | 10-11-06   | M   | 16/Nov/2006 | Mature, dead, gut thin, dark, full of organic matter.                                  | +       |
| A15    | Vaitele |      | 10-11-06   | F   | 16/Nov/2006 | Dead, gut slightly swollen, clear.                                                     | +       |
| A16    | Vaitele |      | 10-11-06   | F   | 16/Nov/2006 | Dead, gut thin, dark, few eggs in oviduct.                                             |         |
| A17    | Vaitele |      | 10-11-06   | F   | 16/Nov/2006 | Dead, gut thin, dark, full of organic matter.                                          | +       |
| A18    | Vaitele |      | 10-11-06   | F   | 16/Nov/2006 | Dead, gut thin, dark with fats attached.                                               |         |
| A19    | Vaitele |      | 13-11-06   | F   | 17/Nov/2006 | Live, gut thin, dark, few eggs in oviduct                                              | (+)     |
| A20    | Vaitele |      | 13-11-06   | F   | 17/Nov/06   | Live, mature, swollen white and empty, egg laden.                                      | +       |
| A21    | Vaitele |      | 13-11-06   | F   | 17/Nov/06   | Dead, mature, gut thin, dark and full of organic matter.                               |         |
| A22    | Vaitele |      | 13-11-06   | M   | 17/Nov/06   | Live, mature, gut slightly swollen, milky.                                             |         |
| A23    | Vaitele |      | 13-11-06   | F   | 17/Nov/06   | Live, female, gut slightly swollen, milky, egg laden                                   |         |
| A24    | Vaitele |      | 13-11-06   | M   | 17/Nov/06   | Live, gut thin, dark full of organic matter                                            |         |
| A25    | Vaitele |      | 13-11-06   | F   | 17/Nov/06   | Live, mature, slightly swollen, milky.                                                 |         |

| Insect | Site    | Trap | Collection | Sex | Dissection | Insect and gut condition                            | PCR     |
|--------|---------|------|------------|-----|------------|-----------------------------------------------------|---------|
|        | No      | No   | Date       |     | Date       |                                                     | Results |
| A26    | Vaitele |      | 22-11-06   | F   | 23/Nov/06  | Mature, gut thin, dark, egg few egg in oviduct.     | (+)     |
| A27    | Vaitele |      | 22-11-06   | M   | 23/Nov/06  | Live, swollen white and empty                       | +       |
| A28    | Vaitele |      | 22-11-06   | M   | 23/Nov/06  | Live, gut thin, dark.                               |         |
| A29    | Vaitele |      | 22-11-06   | F   | 23/Nov/06  | Live, mature, no egg, gut slightly swollen, milky.  |         |
| A30    | Vaitele |      | 22-11-06   | M   | 23/Nov/06  | Dead, gut swollen, milky.                           | +       |
| A31    | Vaitele |      | 22-11-06   | F   | 23/Nov/06  | Young gut swollen white and empty                   |         |
| A32    | Vaitele |      | 22-11-06   | F   | 23/Nov/06  | Young, gut, swollen white and empty, no eggs.       |         |
| A33    | Vaitele |      | 22-11-06   | F   | 23/Nov/06  | Live, gut thin, dark and no eggs.                   |         |
| A34    | Vaitele |      | 22-11-06   | F   | 23/Nov/06  | Live, mature, gut thin, dark no egg.                |         |
| A35    | Vaitele |      | 22-11-06   | M   | 23/Nov/06  | Live, mature, gut thin, dark                        |         |
| A36    | Vaitele |      | 22-11-06   | F   | 23/Nov/06  | Live, young, gut, slightly swollen, milky, no egg.  | +       |
| A37    | Vaitele |      | 22-11-06   | M   | 23/Nov/06  | Live, mature, gut thin, dark                        | +       |
| A38    | Vaitele |      | 22-11-06   | F   | 23/Nov/06  | Mature, gut slightly swollen, milky, no eggs        |         |
| A39    | Vaitele |      | 22-11-06   | F   | 23/Nov/06  | Live, mature, gut thin, dark, no egg                |         |
| A40    | Vaitele |      | 22-11-06   | F   | 23/Nov/06  | Live, gut thin, rear dark.                          |         |
| A41    | Vaitele |      | 24-01-07   | F   | 31/Jan/07  | Live, mature, gut thin, clear, egg laden            | +       |
| A42    | Vaitele |      | 29-01-07   | F   | 31/Jan/07  | Dead, gut thin, dark full of organic matter.        |         |
| A43    | Vaitele |      | 29-01-07   | M   | 31/Jan/07  | Dead, young, gut thin, dark full of organic matter. | +       |
| A44    | Vaitele |      | 29-01-07   | F   | 31/Jan/07  | Mature, dead, gut thin, dark few eggs in oviduct.   |         |
| A45    | Vaitele |      | 29-01-07   | F   | 31/Jan/07  | Young, dead, gut thin, dark no egg                  | +       |
| A46    | Vaitele |      | 29-01-07   | F   | 31/Jan/07  | Mature, live, gut thin, dark, no egg                |         |
| A47    | Vaitele |      | 29-01-07   | M   | 31/01/07   | Mature, live, gut thin, dark.                       |         |
| A48    | Vaitele |      | 29-01-07   | F   | 31/Jan/07  | Mature, dead, gut thin, dark full of organic.       |         |
| A49    | Vaitele |      | 29-01-07   | F   | 31/Jan/07  | Dead, gut thin, dark and full of organic matter.    |         |
| A50    | Vaitele |      | 31-01-07   | F   | 31/01/07   | Mature, live, gut thin clear.                       | +       |

| Insect | Site No.  | Trap No. | Collection Date | Sex | Dissection Date | Insect and gut condition                                                | PC Re: |
|--------|-----------|----------|-----------------|-----|-----------------|-------------------------------------------------------------------------|--------|
| B1     | Mulifanua | 4        | 13/11/06        | F   | 21/11/06        | Live, Gut dark, slightly swollen with few eggs.                         |        |
| B2     | "         | 4        | "               | F   | "               | Live, dark thin gut, lots of fats attached around and eggs in oviducts, |        |
| B3     | "         | 2        | 22/01/07        | F   | 26/01/07        | Pure, gut few eggs healthy.                                             | +      |
| B4     | "         | "        | "               | F   | "               | Live, normal gut.                                                       |        |
| B5     | "         | 3        | "               | F   | "               | Live, matured, slightly swollen gut.                                    |        |
| B6     | "         | 4        | "               | F   | "               | Live, dark thin and brown gut, with fat attached.                       |        |
| B7     | "         | 4        | "               | F   | "               | Live, normal gut, some fat attached.                                    |        |
| B8     | "         | "        | "               | M   | "               | Live, healthy full organic matter.                                      |        |
| B9     | "         | "        | "               | F   | "               | Live, slightly swollen and brown gut few eggs.                          |        |
| B10    | "         | 2        | 29/01/07        | F   | 31/01/07        | Dead, slightly swollen gut, few eggs.                                   |        |
| B11    | "         | 4        | "               | F   | "               | Dead, matured, dark thin gut, normal.                                   | +      |
| B12    | "         | "        | "               | F   | "               | Dead, dark thin gut with few eggs.                                      |        |
| B13    | "         | 3        | 12/02/07        | M   | 14/02/07        | Live, matured dark thin gut.                                            |        |
| B14    | "         | "        | "               | F   | "               | Dead, thin and dark gut, healthy.                                       | (+)    |
| B15    | "         | "        | "               | F   | "               | Dead, matured slightly swollen, and brown gut.                          |        |
| B16    | "         | "        | "               | F   | "               | Dead, young, healthy, dark thin gut.                                    |        |
| B17    | "         | "        | "               | F   | "               | Dead, young, healthy, dark thin gut.                                    |        |
| B18    | "         | "        | "               | F   | "               | Dead, young slightly swollen and white gut.                             |        |
| B19    | "         | 2        | "               | M   | "               | Dead matured swollen white empty gut.                                   |        |
| B20    | "         | 2        | 1022007         | F   | "               | Mature, thin, dark healthy gut                                          |        |

| Insect | Site No.  | Trap No. | Collection Date | Sex | Dissection Date | Insect and gut condition                                | PCR Result |
|--------|-----------|----------|-----------------|-----|-----------------|---------------------------------------------------------|------------|
| B21    | "         | "        | "               | F   | "               | Live, Gut thin and dark                                 |            |
| B22    | "         | "        | "               | F   | "               | Matured, slightly swollen brown gut, with eggs.         |            |
| B23    | "         | "        | "               | F   | "               | Live, milky swollen few eggs.                           |            |
| B24    | "         | "        | "               | M   | "               | Live, dark thin full of organic matter.                 |            |
| B25    | "         | "        | "               | F   | "               | Young, dark thin gut.                                   | +          |
| B26    | Mulifanua | 5        | 26/02/07        | F   | 27/02/07        | Live, dark thin gut, full of organic matter.            |            |
| B27    | "         | "        | "               | F   | "               | Live, matured swollen milky with eggs.                  |            |
| B28    | "         | 2        | "               | F   | "               | Live, thin gut.                                         |            |
| B29    | "         | 5        | "               | F   | "               | Live, swollen white gut.                                |            |
| B30    | "         | "        | "               | F   | "               | Live, matured organic matter and brown gut.             |            |
| B31    | "         | 3        | "               | F   | "               | Live, swollen milky gut, with eggs.                     | +          |
| B32    | "         | 5        | "               | F   | "               | Live, matured slightly swollen white gut.               |            |
| B33    | "         | "        | "               | F   | "               | Live, matured , thin gut, dark with eggs.               |            |
| B34    | "         | 5        | 06/03/07        | F   | 07/03/07        | Dead, brown thin gut, full of organic matter few eggs.  |            |
| B35    | "         | "        | "               | F   | "               | Dead, matured thin dark gut, full of organic matter.    |            |
| B36    | "         | "        | "               | F   | "               | Live, young brown gut, few eggs full of organic matter. |            |
| B37    | "         | 2        | 26/03/07        | F   | 28/03/07        | Live, dark gut few eggs.                                |            |
| B38    | "         | 6        | 23/03/07        | F   | "               | Dead, slightly swollen gut.                             | +          |
| B39    | "         | 2        | "               | F   | "               | Live, dark gut few eggs organic matter.                 |            |
| B40    | "         | 1        | "               | F   | "               | Dead, slightly swollen gut.                             |            |
| B41    | "         | 4        | 02/03/07        | F   | 03/04/07        | Live, thin gut organic matter.                          |            |
| B44    |           |          |                 |     |                 |                                                         | +          |
| B49    |           |          |                 |     |                 |                                                         | +          |



| Insect | Site No. | Trap No. | Collection Date | Sex | Dissection Date | Insect and gut condition                                   | PCR Resu |
|--------|----------|----------|-----------------|-----|-----------------|------------------------------------------------------------|----------|
| C 1    | Safata   | 4        | 23-01-2007      | M   | 26/01/2007      | Live, Gut thin and dark.                                   |          |
| C2     | Safata   | 5        | 30-01-2007      | M   | 31/01/2007      | Dead, Gut dark and thin. Normal healthy gut.               |          |
| C3     | Safata   | 5        | 30-01-2007      | F   | 31/01/2007      | Dead, Gut dark and thin. Healthy gut                       | +        |
| C4     | Safata   | 5        | 30-01-2007      | F   | 31/01/2007      | Young, dead. Gut dark thin                                 |          |
| C5     | Safata   | 5        | 30-01-2007      | F   | 31/01/2007      | Dead, normal dark thin gut.                                |          |
| C6     | Safata   | 5        | 30-01-2007      | M   | 31/01/2007      | Dead. Gut dark and thin                                    |          |
| C7     | Safata   | 5        | 30-01-2007      | F   | 31/01/2007      | Live. Gut slightly swollen, milky.                         |          |
| C8     | Safata   | 4        | 12-02-2007      | F   | 14/02/2007      | Live. Gut slightly swollen. White and empty. No eggs       |          |
| C9     | Safata   | 4        | 12-02-2007      | F   | 14/02/2007      | Dead. Gut swollen. Milky white. No egg                     |          |
| C10    | Safata   | 1        | 12-02-2007      | F   | 14/02/2007      | Live. Gut slightly swollen, milky, egg laden.              |          |
| C11    | Safata   | 5        | 12/02/2007      | F   | 14/02/2007      | Dead. Gut thin and dark. Egg laden                         | +        |
| C12    | Safata   | 4        | 26-02-2007      | F   | 27/02/2007      | Dead young. Gut dark and thin.                             |          |
| C13    | Safata   | 4        | 26-02-2007      | F   | 27/02/2007      | Live. Gut slightly swollen                                 |          |
| C14    | Safata   | 4        | 26-02-207       | F   | 27/02/2007      | Live. Gut swollen, milky.                                  | +        |
| C15    | Safata   | 4        | 26-02-2007      | F   | 27/02/2007      | Young female. Gut thin, dark. Full of organic matter.      |          |
| C16    | Safata   | 4        | 26-02-2007      | F   | 27/02/2007      | Young live female. Gut dark, thin. Full of organic matter. |          |
| C17    | Safata   | 4        | 26-02-2007      | M   | 27/02/2007      | Dead. Gut swollen and milky                                |          |
| C18    | Safata   | 4        | 26-02-2007      | M   | 27/02/2007      | Mature live male. Gut slightly swollen and milky           |          |
| C19    | Safata   | 4        | 26-02-2007      | F   | 27/02/2007      | Live female. Gut slightly swollen. And milky               |          |
| C20    | Safata   | 4        | 26-02-2007      | F   | 27/02/2007      | Live mature. Gut slightly swollen. Milky.                  |          |
| C21    | Safata   | 4        | 26-02-2007      | F   | 27/02/2007      | Live young female. Gut thin and dark.                      |          |

| Insect | Site No. | Trap No. | Collection Date | Sex | Dissection Date | Insect and gut condition                                         | PCR Result |
|--------|----------|----------|-----------------|-----|-----------------|------------------------------------------------------------------|------------|
| C22    | Safata   | 4        | 26-02-2007      | F   | 27/02/2007      | Young live female. Gut dark and thin. Full of organic matter.    |            |
| C23    | Safata   | 4        | 26-02-2007      | F   | 27/02/2007      | Live and slightly swollen gut.                                   |            |
| C24    | Safata   | 4        | 26-02-2007      | F   | 27/02/2007      | Young live. Gut dark thin. Full of organic matter                |            |
| C25    | Safata   | 4        | 26-02-2007      | F   | 27/02/2007      | Live slightly swollen, dark rear gut.                            | +          |
| C26    | Safata   | 2        | 26-02-2007      | F   | 27/02/2007      | Live female. Gut dark and thin with fats attached.               |            |
| C27    | Safata   | 2        | 26-02-2007      | F   | 27/02/2007      | Live young female. Gut swollen and milky.                        |            |
| C28    | Safata   | 2        | 26-02-2007      | F   | 27/02/2007      | Live female. Gut thin, dark. Full of organic matter              |            |
| C29    | Safata   | 2        | 26-02-2007      | F   | 27/02/2007      | Young live female. Gut slightly swollen, milky                   |            |
| C29    | Safata   | 2        | 26-02-2007      | F   | 27/02/2007      | Live female. Gut slightly swollen and milky, few organic matter. |            |
| C30    | Safata   | 2        | 26-02-2007      | F   | 27/02/2007      | Live female. Gut thin and dark.                                  |            |
| C31    | Safata   | 1        | 26-02-2007      | M   | 27/02/2007      | Live mature male. Gut thin and dark.                             | (+)        |
| C32    | Safata   | 1        | 26-02-2007      | F   | 27/02/2007      | Dead female. Gut white and empty.                                |            |
| C33    | Safata   | 1        | 26-02-2007      | F   | 27/02/2007      | Dead mature female. Gut dark rear. Few organic matter.           |            |
| C34    | Safata   | 1        | 26-02-2007      | F   | 27/02/2007      | Dead female. Gut thin and dark.                                  |            |
| C35    | Safata   | 2        | 26-02-2007      | F   | 27/02/2007      | Dead female. Gut white and empty                                 |            |
| C36    | Safata   | 4        | 06-03-2007      | F   | 07/03/2007      | Dead young female. Gut thin and dark.                            |            |
| C37    | Safata   | 4        | 06-03-2007      | F   | 07/03/2007      | Dead young female. Gut thin and dark. Full of organic matter.    |            |
| C38    | Safata   | 4        | 06-03-2007      | F   | 07/03/2007      | Dead young female. Gut thin and dark.                            | +          |

| Insect | Site No. | Trap No. | Collection Date | Sex | Dissection Date | Insect and gut condition                                       | PCR Result |
|--------|----------|----------|-----------------|-----|-----------------|----------------------------------------------------------------|------------|
| C39    | Safata   | 4        | 06-03-2007      | F   | 07/03/2007      | Dead female. Gut dark rear. Few organic matter.                |            |
| C40    | Safata   | 3        | 06-03-2007      | F   | 07/03/2007      | Mature dead female. Gut thin and dark.                         |            |
| C41    | Safata   | 3        | 06-03-2007      | M   | 07/03/2007      | Mature dead male. Gut thin and dark with fats attach.          |            |
| C42    | Safata   | 2        | 06-03-2007      | F   | 07/03/2007      | Dead female Gut thin and dark                                  |            |
| C43    | Safata   | 1        | 26-03-2007      | F   | 28/03/2007      | Dead female. Gut dark and thin.                                |            |
| C44    | Safata   | 1        | 26-03-2007      | M   | 28/03/2007      | Live female. Gut dark and thin.                                | (+)        |
| C45    | Safata   | 2        | 02-04-2007      | F   | 03/04/2007      | Dead female. Gut slightly swollen. Milky.                      |            |
| C46    | Safata   | 4        | 02-04-2007      | F   | 03/04/2007      | Live mature female. Gut thin and dark. Full of organic matter. |            |
| C47    | Safata   | 2        | 02-04-2007      | M   | 03/04/2007      | Live male. Gut dark and thin.                                  |            |
| C48    | Safata   | 4        | 11-04-2007      | F   | 12/04/2007      | Live female. Gut swollen and milky.                            |            |
| C49    | Safata   | 2        | 11-04-2007      | F   | 12/04/2007      | Dead female. Gut thin and dark. Full of organic matter.        | +          |
| C50    | Safata   | 2        | 11-04-2007      | F   | 12/04/2007      | Dead female. Gut thin and dark. Egg laden.                     |            |

| Insect | Site      | Trap | Collection | Sex | Dissection | Insect and gut condition                                                                    | PCR     |
|--------|-----------|------|------------|-----|------------|---------------------------------------------------------------------------------------------|---------|
|        | No        | No   | Date       |     | Date       |                                                                                             | Results |
| D1     | Falealili | 1    | 15-11-2006 | F   | 21/11/2006 | Dead female, gut thin, dark full of organic matter.                                         | +       |
| D2     | Falealili | 3    | 15-11-2006 | F   | 21/11/2006 | Live young female, gut thin dark, few organic matter                                        |         |
| D3     | Falealili | 1    | 15-11-2006 | M   | 21/11/2006 | Live, gut swollen, milky.                                                                   |         |
| D4     | Falealili | 1    | 15-11-2006 | F   | 21/11/2006 | Live young female, gut thin, dark, few in oviduct.                                          | +       |
| D5     | Falealili | 3    | 15-11-2006 | M   | 21/11/2006 | Live mature male, gut slightly swollen, milky                                               |         |
| D6     | Falealili | 1    | 15-11-2006 | F   | 21/11/2006 | Live, mature, swollen and milky.                                                            |         |
| D7     | Falealili | 1    | 15-11-2006 | M   | 21/11/2006 | Dead mature male, gut thin, dark.                                                           | +       |
| D8     | Falealili | 1    | 22-11-2006 | F   | 23/11/2006 | Live female, mature gut thin, dark, normal.                                                 | +       |
| D9     | Falealili | 5    | 22-11-2006 | F   | 23/11/2006 | Live, gut slightly swollen, brown few organic matter, few eggs in the oviduct, fat attached |         |
| D10    | Falealili | 5    | 22-11-2006 | F   | 23/11/2006 | Live mature female, gut dark and thin, eggs laden.                                          |         |
| D11    | Falealili | 5    | 22-11-2006 | F   | 23/11/2006 | Live young female, gut slightly swollen, eggs laden.                                        | +       |
| D12    | Falealili | 5    | 22-11-2006 | F   | 23/11/2006 | Live young female, brown thin gut, few organic, egg in the oviduct.                         | +       |
| D13    | Falealili | 5    | 22-11-2006 | F   | 23/11/2006 | Live female, eggs laden, gut dark thin.                                                     | +       |
| D14    | Falealili | 3    | 22-11-2006 | F   | 23/11/2006 | Live mature female, gut dark, thin.                                                         |         |
| D15    | Falealili | 3    | 22-11-2006 | M   | 23/11/2006 | Live male, gut slightly swollen, milky.                                                     |         |
| D16    | Falealili | 3    | 22-11-2006 | F   | 23/11/2006 | Live female gut brown, slightly swollen.                                                    | +       |
| D17    | Falealili | 3    | 05-02-2007 | F   | 07/02/2007 | Dead mature female, gut thin, clear no egg.                                                 |         |
| D18    | Falealili | 3    | 05-02-2007 | M   | 07/02/2007 | Dead mature female, slightly swollen milky.                                                 |         |
| D19    | Falealili | 3    | 05-02-2007 | F   | 07/02/2007 | Dead mature female, gut swollen, milky, eggs laden                                          |         |
| D20    | Falealili | 3    | 05-02-2007 | F   | 07/02/2007 | Young female, gut dark, thin. Lots of organic matter.                                       |         |
| D21    | Falealili | 3    | 05-02-2007 | F   | 07/02/2007 | Gut dark, thin, lots of organic matter, no eggs.                                            | +       |
| D22    | Falealili | 3    | 05-02-2007 | M   | 07/02/2007 | Live mature, gut slightly swollen, brown with some fats attached.                           |         |



| Insect | Site      | Trap | Collection | Sex | Dissection | Insect and gut condition                                            | PCR |
|--------|-----------|------|------------|-----|------------|---------------------------------------------------------------------|-----|
|        | No        | No   | Date       |     | Date       | Results                                                             |     |
| D23    | Falealili | 3    | 05-02-2007 | F   | 02/02/2007 | Dead matured female, gut dark thin, full of organic matter.         |     |
| D24    | Falealili | 3    | 05-02-2007 | F   | 02/02/2007 | Live female, gut thin, clear.                                       |     |
| D25    | Falealili | 3    | 05-02-2007 | M   | 02/02/2007 | Dead mature male Gut swollen white and empty                        |     |
| D26    | Falealili | 3    | 19-02-2007 | F   | 21/02/2007 | Matured female, gut swollen, milky. Egg laden                       |     |
| D27    | Falealili | 3    | 19-02-2007 | F   | 21/02/2007 | Live mature female. Gut thin, dark. Full of organic matter. No eggs |     |
| D28    | Falealili | 3    | 19-02-2007 | M   | 21/02/2007 | Dead male. Gut swollen white and empty                              |     |
| D29    | Falealili | 3    | 19-02-2007 | F   | 21/02/2007 | Dead mature female. Gut thin, dark full of organic matter           |     |
| D30    | Falealili | 3    | 19-02-2007 | F   | 21/02/2007 | Dead female. Gut slightly swollen. Egg laden                        |     |
| D31    | Falealili | 3    | 19-02-2007 | M   | 21/02/2007 | Dead male. Gut thin, dark full of organic matter.                   |     |
| D32    | Falealili | 3    | 19-02-2007 | F   | 21/02/2007 | Dead mature female. Gut swollen white and empty                     | +   |
| D33    | Falealili | 4    | 19-02-2007 | F   | 21/02/2007 | Dead mature. Gut slightly swollen, brown. Egg laden                 |     |
| D34    | Falealili | 4    | 19-02-2007 | F   | 21/02/2007 | Dead female. Gut swollen white and empty.                           | +   |
| D35    | Falealili | 4    | 19-02-2007 | F   | 21/02/2007 | Female dead. Gut thin, dark. Full of organic matter.                |     |
| D36    | Falealili | 4    | 19-02-2007 | F   | 21/02/2007 | Live female. Gut slightly swollen, dark rear.                       |     |
| D37    | Falealili | 4    | 19-02-2007 | F   | 21/02/2007 | Live female. Gut thin, dark. Egg laden.                             |     |
| D38    | Falealili | 4    | 19-02-2007 | F   | 21/02/2007 | Dead mature female. Gut dark, thin, full of organic matter          | +   |
| D39    | Falealili | 4    | 19-02-2007 | F   | 21/02/2007 | Live female. Gut slightly swollen, milky. No egg                    |     |
| D40    | Falealili | 4    | 19-02-2007 | F   | 21/02/2007 | Dead female. Gut slightly swollen, brown with few organic matter.   | +   |
| D41    | Falealili | 5    | 19-02-2007 | F   | 21/02/2007 | Dead female. Gut slightly swollen, milky. No egg                    |     |
| D42    | Falealili | 5    | 19-02-2007 | F   | 21/02/2007 | Dead female. Gut dark, thin. No egg.                                |     |
| D43    | Falealili | 5    | 19-02-2007 | F   | 21/02/2007 | Live female. Gut dark, thin. Egg laden                              |     |
| D44    | Falealili | 1    | 06-03-2007 | F   | 07/03/2007 | Live female. Gut dark, thin. No egg                                 |     |
| D45    | Falealili | 1    | 06-02-2007 | M   | 07/03/2007 | Live mature male. Gut dark, thin full of organic matter             |     |

| Insect | Site      | Trap | Collection | Sex | Dissection | Insect and Gut Condition                                          | PCR |
|--------|-----------|------|------------|-----|------------|-------------------------------------------------------------------|-----|
|        | No        | No   | Date       |     | Date       | Result                                                            |     |
| D46    | Falealili | 1    | 06-03-2007 | F   | 07/03/2007 | Live female. Gut swollen white and empty. No egg                  |     |
| D47    | Falealili | 1    | 06-03-2007 | F   | 07/03/2007 | Dead female, Gut slightly swollen milky. Few eggs in the oviduct. | +   |
| D48    | Falealili | 1    | 06-03-2007 | F   | 07/03/2007 | Dead female. Gut dark, thin. No egg                               |     |
| D49    | Falealili | 1    | 06-03-2007 | F   | 07/03/2007 | Dead female. Gut dark, thin. Full of organic matter. No egg.      | +   |
| D50    | Falealili | 1    | 06-03-2007 | F   | 07/03/2007 | Dead female. Slightly swollen milky. Egg laden                    |     |

| Insect | Site No. | Trap No. | Collection Date | Sex | Dissection Date | Insect and Gut Condition                                             | PCR Results |
|--------|----------|----------|-----------------|-----|-----------------|----------------------------------------------------------------------|-------------|
| E1     | Tiavea   | 4        | 15-11-2006      | F   | 21/11/2006      | Dead mature female. Gut dark thin, full of organic matter. No eggs.  |             |
| E2     | Tiavea   | 4        | 15-11-2006      | M   | 21/11/2006      | Dead mature male. Gut dark thin.                                     |             |
| E3     | Tiavea   | 1        | 15-11-2006      | F   | 21/11/2006      | Live young female. Gut dark rear. Slightly swollen. No eggs          | +           |
| E4     | Tiavea   | 1        | 15-11-2006      | M   | 21/11/2006      | Dead mature male. Gut thin, clear.                                   |             |
| E5     | Tiavea   | 1        | 15-11-2006      | F   | 21/11/2006      | Live female. Gut thin, clear. Eggs deposit in the oviduct.           |             |
| E6     | Tiavea   | 1        | 15-11-2006      | F   | 21/11/2006      | Gut thin, dark. Lots of fat attached. No eggs.                       |             |
| E7     | Tiavea   | 1        | 15-11-2006      | F   | 21/11/2006      | Live female. Gut slightly swollen, milky. No eggs.                   |             |
| E8     | Tiavea   | 1        | 15-11-2006      | F   | 21/11/2006      | Mature female. Gut slightly swollen, milky. Egg laden.               |             |
| E9     | Tiavea   | 1        | 15-11-2006      | F   | 21/11/2006      | Young live female. Gut swollen, white.                               |             |
| E10    | Tiavea   | 1        | 15-11-2006      | F   | 21/11/2006      | Young female. Gut slightly swollen, milky. No eggs                   |             |
| E11    | Tiavea   | 5        | 22-11-2006      | F   | 23/11/2006      | Live female. Gut thin, dark. Few eggs in the oviduct.                | neg.        |
| E12    | Tiavea   | 5        | 25-01-2007      | M   | 26/01/2007      | Dead female. Gut thin, dark.                                         |             |
| E13    | Tiavea   | 5        | 25-01-2007      | M   | 26/01/2007      | Dead male. Gut thin, clear.                                          |             |
| E14    | Tiavea   | 5        | 25-01-2007      | M   | 26/01/2007      | Live mature male. Gut thin, dark.                                    | +           |
| E15    | Tiavea   | 3        | 25-01-2007      | F   | 26/01/2007      | Dead young female. Gut thin clear. No eggs                           |             |
| E16    | Tiavea   | 4        | 05-02-2007      | M   | 07/02/2007      | Mature male. Gut thin, dark.                                         |             |
| E17    | Tiavea   | 4        | 19-02-2007      | F   | 21/02/2007      | Dead female. Gut slightly swollen, milky.                            |             |
| E18    | Tiavea   | 4        | 19-02-2007      | F   | 21/02/2007      | Live female. Gut swollen, milky. Egg laden.                          |             |
| E19    | Tiavea   | 4        | 19-02-2007      | F   | 21/02/2007      | Live young female. Gut thin, dark.                                   |             |
| E20    | Tiavea   | 4        | 19-02-2007      | F   | 21/02/2007      | Dead mature female. Gut thin, dark, full of organic matter.          |             |
| E21    | Tiavea   | 4        | 19-02-2007      | F   | 21/02/2007      | Dead young female. Gut swollen white and empty. Eggs in the oviduct. |             |
| E22    | Tiavea   | 4        | 19-02-2007      | F   | 21/02/2007      | Mature live female. Gut thin, dark full of organic matter.           |             |
| E23    | Tiavea   | 4        | 19-02-2007      | F   | 21/02/2007      | Live mature female. Gut thin dark                                    |             |
| E24    | Tiavea   | 4        | 19-02-2007      | M   | 21/02/2007      | Live mature male. Gut slightly swollen. Dark rear.                   |             |
| E25    | Tiavea   | 2        | 19-02-2007      | F   | 21/02/2007      | Dead mature female. Gut thin, dark. Full of organic matter.          | neg.        |

| Insect | Site No. | Trap No. | Collection Date | Sex | Dissection Date | Insect and Gut Condition                                  | PCR Result |
|--------|----------|----------|-----------------|-----|-----------------|-----------------------------------------------------------|------------|
| E26    | Tiavea   | 2        | 19-02-2007      | F   | 21/02/2007      | Dead mature. Gut thin, dark.                              |            |
| E27    | "        | 2        | 19-02-2007      | F   | 21/02/2007      | Dead young . Gut thin, dark.                              |            |
| E28    | "        | 2        | 19-02-2007      | M   | 21/02/2007      | Dead. Gut slightly swollen. Milky                         |            |
| E29    | "        | 2        | 19-02-2007      | M   | 21/02/2007      | Live. Gut swollen and white.                              |            |
| E30    | "        | 2        | 19-02-2007      | F   | 21/02/2007      | Dead mature. Gut thin, dark. Full of organic matter.      |            |
| E31    | "        | 1        | 19-02-2007      | F   | 21/02/2007      | Dead, Gut slightly swollen.                               | +          |
| E32    | "        | 1        | "               | M   | "               | Dead, matured & slightly swollen milky gut.               |            |
| E33    | "        | 1        | 05/03/07        | M   | 07/03/07        | Dead, thin gut & full of organic matter.                  |            |
| E34    | "        | 1        | "               | F   | "               | Dead, milky, swollen, white gut & few eggs.               |            |
| E35    | "        | 1        | "               | M   | "               | Live, thin, brown gut.                                    |            |
| E36    | "        | 1        | "               | F   | "               | Dead, thin, brown gut.                                    |            |
| E37    | "        | 1        | "               | F   | "               | Dead, thin , brown gut & few eggs.                        |            |
| E38    | "        | 1        | "               | F   | "               | Dead, matured, thin, dark gut with eggs.                  | +          |
| E39    | "        | 1        | "               | F   | "               | Dead ,dark gut full of organic matter & few eggs.         |            |
| E40    | "        | 1        | "               | F   | "               | Live, milky white gut with eggs.                          |            |
| E41    | "        | 1        | "               | F   | "               | Dead, matured, full of organic matter and brown gut.      |            |
| E42    | "        | 1        | "               | F   | "               | Live, young, dark, thin gut with organic matter and eggs. |            |
| E43    | "        | 3        | "               | M   | "               | Dead, white, empty swollen.                               |            |
| E44    | "        | 2        | "               | F   | "               | Dead, dark thin full of organic matter.                   | (+)        |
| E45    | "        | 2        | "               | F   | "               | Dead, dark , few eggs, thin gut and fat attach.           |            |
| E46    | "        | 4        | 19/03/07        | F   | 21/03/07        | Dead, milky white gut .                                   |            |
| E47    | "        | 2        | "               | F   | "               | Dead , thin gut ,dark                                     |            |
| E48    | "        | 4        | "               | M   | "               | Dead, thin brown gut with organic matter.                 |            |
| E49    | "        | 4        | "               | F   | "               | Dead, slightly swollen, milky gut.                        | +          |
| E50    | "        | 4        | "               | F   | "               | Live, swollen milky gut.                                  |            |
