# Supplementary material for: Coconut Rhinoceros Beetle in Samoa: Review of a Century-Old Invasion and Prospects for Control in a Changing Future
Source: Insects. 2022 May 23;13(5):487. doi: 10.3390/insects13050487 (PMC9145595; doi:10.3390/insects13050487)
Supplement: Supplementary file 1 [file insects-13-00487-s001.zip › Table S1.xlsx]

## Sheet: Sheet1
Table S1: Summary table of haplotype, virus detection and histology results Note: Only a subset of samples were prepared for histological analysis.
S.N	AgR ID	Data Collected	Location/Site	GPS Coordinates (Lat./Long.)		OrNV Detected	Haplotype Grouping	Clade Designation*	Histology
1	20-0828	2020-07-07	Matautu	-13.827	-171.759	+ve	CRB-S	III-A	Virus symptoms observed
2	20-0829	2020-07-07	Saina	-13.8176	-171.806	+ve	CRB-S	III-A	Virus symptoms observed
3	20-0830	2020-07-07	Saina	-13.8176	-171.806	-ve	CRB-S	III-A	No virus symptoms
4	20-0831	2020-07-07	Saina	-13.8176	-171.806	+ve	CRB-S	III-A
5	20-0832	2020-07-07	Toamua	-13.8228	-171.824	+ve	CRB-S	III-A	Virus symptoms observed
6	20-0833	2020-07-07	Toamua	-13.8228	-171.824	-ve	CRB-S	III-A	No virus symptoms
7	20-0834	2020-07-07	Toamua	-13.8228	-171.824	+ve	CRB-S	III-C
8	20-0835	2020-07-07	Ululoloa	-13.8515	-171.814	-ve	CRB-S	III-C	No virus symptoms
9	20-0836	2020-07-07	Vaitele uta	-13.8381	-171.808	+ve	CRB-S	III-C
10	20-0837	2020-07-07	Vaitele uta	-13.8381	-171.808	+ve	CRB-S	III-C	Virus symptoms observed
11	20-0838	2020-07-07	Vaitele uta	-13.8381	-171.808	-ve	CRB-S	III-A	No virus symptoms
12	20-0839	2020-07-07	Tapatapao	-13.8614	-171.878	+ve	CRB-S	III-A
13	20-0840	2020-07-07	Tapatapao	-13.8614	-171.878	+ve	CRB-S	III-A	Virus symptoms observed
14	20-0841	2020-07-07	Falelauniu	-13.8413	-171.829	+ve	CRB-S	III-C	Virus symptoms observed
15	20-0842	2020-07-07	Faleula	-13.8113	-171.836	+ve	CRB-S	III-A	Virus symptoms observed
16	20-0843	2020-07-09	Malololelei	-13.8775	-171.769	+ve	CRB-S	III-C
17	20-0844	2020-07-09	Malololelei	-13.8775	-171.769	+ve	CRB-S	nd	Virus symptoms observed
18	20-0845	2020-07-09	Malololelei	-13.8775	-171.769	+ve	CRB-S	III-A
19	20-0846	2020-07-09	Vailima	-13.8669	-171.76	+ve	CRB-S	III-A	Virus symptoms observed
20	20-0847	2020-07-09	Vailima	-13.8669	-171.76	+ve	CRB-S	III-A
21	20-0848	2020-07-09	Vaivase tai	-13.8457	-171.746	+ve	CRB-S	III-C	Virus symptoms observed
22	20-0849	2020-07-09	Vaivase tai	-13.8457	-171.746	-ve	CRB-S	III-C
23	20-0850	2020-07-09	Fagalii (golf course)	-13.8495	-171.736	+ve	CRB-S	III-C
24	20-0851	2020-07-09	Fagalii (golf course)	-13.8495	-171.736	+ve	CRB-S	III-A	Virus symptoms observed
25	20-0852	2020-07-09	Vailele	-13.8473	-171.73	+ve	CRB-S	III-C
26	20-0853	2020-07-09	Vailele	-13.8473	-171.73	+ve	CRB-S	III-C	Virus symptoms observed
27	20-0854	2020-07-09	Letogo	-13.8565	-171.728	+ve	CRB-S	III-C	Virus symptoms observed
28	20-0855	2020-07-09	Letogo	-13.8565	-171.728	+ve	CRB-S	III-A
29	20-0856	2020-07-09	Laulii	-13.8628	-171.701	+ve	CRB-S	III-A
30	20-0857	2020-07-09	Laulii	-13.8628	-171.701	+ve	CRB-S	III-A	Virus symptoms observed
31	20-0858	2020-07-14	Eva	-13.8819	-171.631	+ve	CRB-S	III-A	Virus symptoms observed
32	20-0859	2020-07-14	Eva	-13.8819	-171.631	+ve	CRB-S	III-A
33	20-0860	2020-07-14	Vailoa – Saoluafata	-13.8819	-171.616	+ve	CRB-S	III-A	Virus symptoms observed
34	20-0861	2020-07-14	Vailoa – Saoluafata	-13.8819	-171.616	+ve	CRB-S	III-A
35	20-0862	2020-07-14	Saoluafata	-13.8837	-171.607	+ve	CRB-S	nd	Virus symptoms observed
36	20-0863	2020-07-14	Saoluafata	-13.8837	-171.607	+ve	CRB-S	nd
37	20-0864	2020-07-14	Solaua 1	-13.9055	-171.619	+ve	CRB-S	III-A	Virus symptoms observed
38	20-0865	2020-07-14	Solaua 1	-13.9055	-171.619	+ve	CRB-S	nd
39	20-0866	2020-07-14	Solaua 1	-13.9055	-171.619	+ve	CRB-S	III-A
40	20-0867	2020-07-14	Sauniatu	-13.924	-171.621	+ve	CRB-S	III-C
41	20-0868	2020-07-14	Sauniatu	-13.924	-171.621	+ve	CRB-S	III-A	Virus symptoms observed
42	20-0869	2020-07-14	Sauniatu	-13.924	-171.621	+ve	CRB-S	III-C
43	20-0870	2020-07-14	Falefa 1	-13.887	-171.589	+ve	CRB-S	III-A
44	20-0871	2020-07-14	Falefa 1	-13.887	-171.589	+ve	CRB-S	III-A	Virus symptoms observed
45	20-0872	2020-07-14	Falefa 3	-13.8944	-171.594	+ve	CRB-S	III-A	Virus symptoms observed
46	20-0873	2020-07-14	Falefa 3	-13.8944	-171.594	+ve	CRB-S	III-A
47	20-0874	2020-07-14	Falefa 3	-13.8944	-171.594	+ve	CRB-S	III-C
48	20-0875	2020-07-14	Falevao	-13.933	-171.582	+ve	CRB-S	III-A
49	20-0876	2020-07-14	Falevao	-13.933	-171.582	-ve	CRB-S	III-A	Virus symptoms observed
50	20-0877	2020-07-14	Falevao	-13.933	-171.582	+ve	CRB-S	III-A	Virus symptoms observed
51	20-0878	2020-07-17	Le Mafa	-13.9688	-171.578	+ve	CRB-S	III-A
52	20-0879	2020-07-17	Le Mafa	-13.9688	-171.578	+ve	CRB-S	III-A
53	20-0880	2020-07-17	Samusu	-13.9987	-171.434	+ve	CRB-S	III-A	Virus symptoms observed
54	20-0881	2020-07-17	Samusu	-13.9987	-171.434	+ve	CRB-S	III-A
55	20-0882	2020-07-17	Mutiatele	-14.0141	-171.431	+ve	CRB-S	III-A
56	20-0883	2020-07-17	Mutiatele	-14.0141	-171.431	+ve	CRB-S	III-A	Virus symptoms observed
57	20-0884	2020-07-17	Lalomanu	-14.0434	-171.443	+ve	CRB-S	III-A
58	20-0885	2020-07-17	Lalomanu	-14.0434	-171.443	+ve	CRB-S	III-C	Virus symptoms observed
59	20-0886	2020-07-17	Saleapaga	-14.0312	-171.493	+ve	CRB-S	III-C
60	20-0887	2020-07-17	Saleapaga	-14.0312	-171.493	+ve	CRB-S	nd	Virus symptoms observed
61	20-0888	2020-07-17	Lepa	-14.0338	-171.527	+ve	CRB-S	nd	Virus symptoms observed
62	20-0889	2020-07-17	Lepa	-14.0338	-171.527	+ve	CRB-S	III-C
63	20-0890	2020-07-17	Lotofaga	-14.0355	-171.575	+ve	CRB-S	III-A
64	20-0891	2020-07-17	Lotofaga	-14.0355	-171.575	+ve	CRB-S	III-A	Virus symptoms observed
65	20-0892	2020-07-17	Poutasi	-14.0269	-171.694	+ve	CRB-S	III-A
66	20-0893	2020-07-17	Poutasi	-14.0269	-171.694	+ve	CRB-S	III-A
67	20-0894	2020-07-17	Poutasi	-14.0269	-171.694	+ve	CRB-S	III-A	Virus symptoms observed
68	20-0895	2020-07-21	Afega	-13.8052	-171.853	+ve	CRB-S	III-A	Virus symptoms observed
69	20-0896	2020-07-21	Afega	-13.8052	-171.853	+ve	CRB-S	III-A
70	20-0897	2020-07-21	Afega	-13.8052	-171.853	+ve	CRB-S	III-A
71	20-0898	2020-07-21	Saleimoa	-13.8089	-171.896	+ve	CRB-S	III-A
72	20-0899	2020-07-21	Saleimoa	-13.8089	-171.896	+ve	CRB-S	III-A	Virus symptoms observed
73	20-0900	2020-07-21	Saleimoa	-13.8089	-171.896	-ve	CRB-S	III-A	Virus symptoms observed
74	20-0901	2020-07-21	Fasitoo Tai	-13.8216	-171.972	-ve	CRB-S	III-A	No virus symptoms
75	20-0902	2020-07-21	Fasitoo Tai	-13.8216	-171.972	+ve	CRB-S	III-A
76	20-0903	2020-07-21	Fasitoo Tai	-13.8216	-171.972	+ve	CRB-S	nd
77	20-0904	2020-07-21	Fasitoo Tai	-13.8415	-171.962	+ve	CRB-S	III-A
78	20-0905	2020-07-21	Fasitoo Tai	-13.8415	-171.962	+ve	CRB-S	nd	Virus symptoms observed
79	20-0906	2020-07-21	Fasitoo Tai	-13.8415	-171.962	-ve	CRB-S	III-A	Virus symptoms observed
80	20-0907	2020-07-21	Satapuala	-13.8367	-171.996	+ve	CRB-S	III-A
81	20-0908	2020-07-21	Satapuala	-13.8367	-171.996	+ve	CRB-S	III-C	Virus symptoms observed
82	20-0909	2020-07-21	Satapuala	-13.8367	-171.996	+ve	CRB-S	III-A
83	20-0910	2020-07-21	Faleolo	-13.8325	-171.998	+ve	CRB-S	III-A
84	20-0911	2020-07-21	Faleolo	-13.8325	-171.998	+ve	CRB-S	III-C
85	20-0912	2020-07-21	Faleolo	-13.8325	-171.998	+ve	CRB-S	nd	Virus symptoms observed
86	20-0913	2020-07-21	STEC	-13.842	-172.02	+ve	CRB-S	III-A	Virus symptoms observed
87	20-0914	2020-07-21	STEC	-13.842	-172.02	+ve	CRB-S	III-A
88	20-0915	2020-07-21	STEC	-13.842	-172.02	+ve	CRB-S	III-A
89	20-0916	2020-07-21	Faleaseela Tai	-13.9285	-171.978	+ve	CRB-S	nd
90	20-0917	2020-07-21	Faleaseela Tai	-13.9285	-171.978	+ve	CRB-S	III-A	Virus symptoms observed
91	20-0918	2020-07-21	Faleaseela Tai	-13.9285	-171.978	+ve	CRB-S	III-C
92	20-0919	2020-07-21	Siufaga	-13.9017	-172.027	+ve	CRB-S	III-C	Virus symptoms observed
93	20-0920	2020-07-21	Siufaga	-13.9017	-172.027	+ve	CRB-S	nd
94	20-0921	2020-07-21	Siufaga	-13.9017	-172.027	+ve	CRB-S	nd
95	20-0922	2020-07-21	Lalovi	-13.8496	-172.055	+ve	CRB-S	III-A
96	20-0923	2020-07-21	Lalovi	-13.8496	-172.055	+ve	CRB-S	III-C	Virus symptoms observed
97	20-0924	2020-07-21	Lalovi	-13.8496	-172.055	+ve	CRB-S	III-C
98	20-0925	2020-07-21	Fasitoo Uta	-13.811	-171.939	+ve	CRB-S	III-A
99	20-0926	2020-07-21	Fasitoo Uta	-13.811	-171.939	+ve	CRB-S	nd
100	20-0927	2020-07-21	Fasitoo Uta	-13.811	-171.939	+ve	CRB-S	III-A	Virus symptoms observed
* III-A indicates specimens were identical to the Samoa A15 reference sequence, while III-C specimens were identical to the Samoa A35 reference sequence (see Marshall et al. 2017); nd = not determined
